# Supplementary material for: Engineering ‘cell robots’ for parallel and highly sensitive screening of biomolecules under in vivo conditions
Source: PubMed Central journal article supplement (PMC5680304; doi:10.1038/s41598-017-15621-0), 2017-11-09
Supplement: 41598_2017_15621_MOESM1_ESM.pdf [file 41598_2017_15621_MOESM1_ESM.pdf]

**Engineering ‘cell robots’ for parallel and highly sensitive screening of biomolecules under *in vivo* conditions**

Lifu Song<sup>1</sup> and An-Ping Zeng<sup>2\*</sup>

<sup>1</sup> Institute of Bioprocess and Biosystems Engineering, Hamburg University of Technology, Denickestrasse 15, D-21073 Hamburg, Germany. E-mail: lifu.ibb@gmail.com.

<sup>2</sup> Institute of Bioprocess and Biosystems Engineering, Hamburg University of Technology, Denickestrasse 15, D-21073 Hamburg, Germany. Phone: +49 (0)40 42878 – 4183. E-mail: [aze@tuhh.de](mailto:aze@tuhh.de).

\*corresponding author

## Supplementary information

Plasmid map and full sequences of M13-lysC and AP-Lys-B.

### Plasmid maps of AP-lys-B

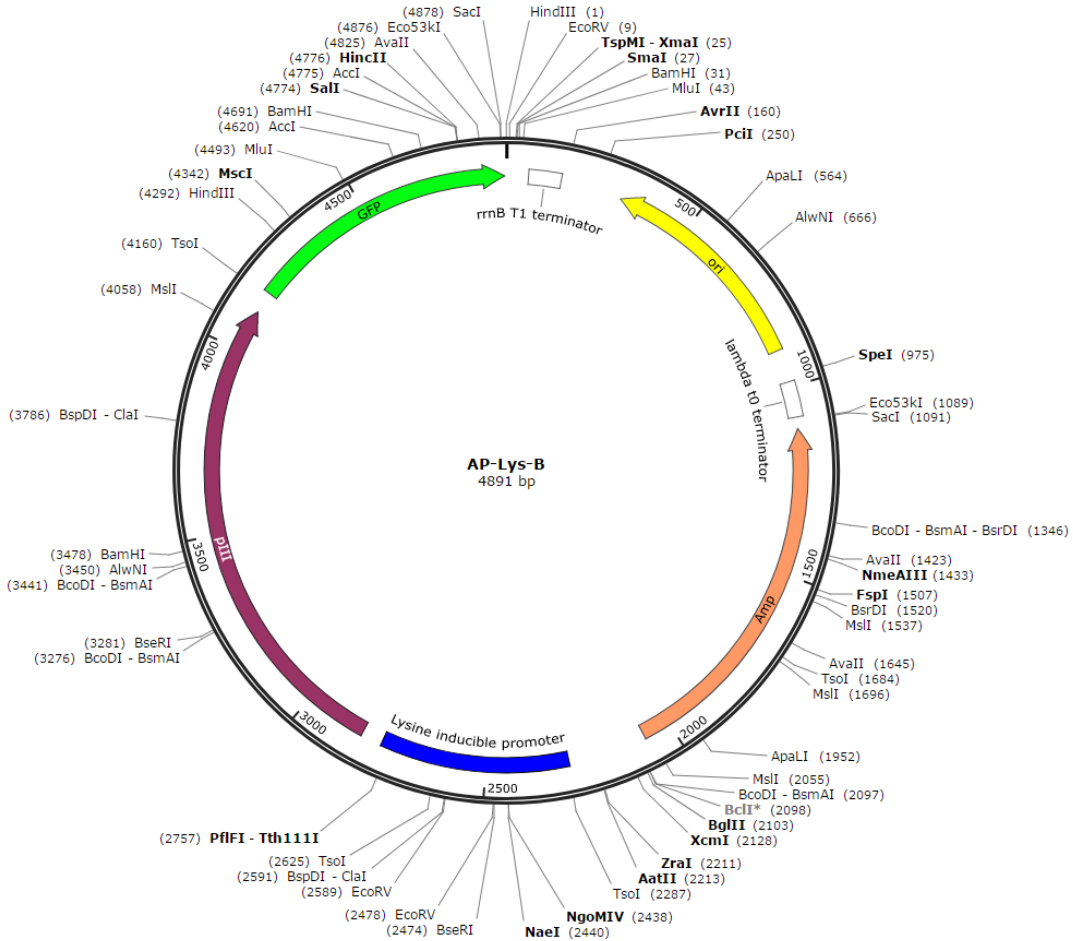

### Full sequences of AP-lys-B

AAGCTTGATATCGAATTCCTGCAGCCCGGGGATCCCATGGTACGCGTGCTAGAGGCATCAAATAAACGAA  
 AGGCTCAGTCGAAAGACTGGGCCTTTCGTTTTATCTGTTGTTTGTCGGTGAACGCTCTCCTGAGTAGGACAA  
 ATCCGCCGCCCTAGACCTAGGGCGTTCGGCTGCGGCGAGCGGTATCAGCTCACTCAAAGGCGGTAATACGG  
 TTATCCACAGAATCAGGGGATAACGCAGGAAAGAACATGTGAGCAAAAGGCCAGCAAAAGGCCAGGAACC  
 GTAAAAAGGCCGCGTTGCTGGCGTTTTTCCATAGGCTCCGCCCCCTGACGAGCATCACAAAAATCGACGCT  
 CAAGTCAGAGGTGGCGAAACCCGACAGGACTATAAAGATACCAGGCGTTTCCCCCTGGAAGCTCCCTCGTG  
 CGCTCTCCTGTTCCGACCCTGCCGCTTACCGGATACCTGTCCGCTTTCTCCCTTCGGGAAGCGTGGCGCTTT  
 CTCAATGCTCAGCTGTAGGTATCTCAGTTCGGTGTAGGTGCTTCGCTCCAAGCTGGGCTGTGTGCACGAAC  
 CCCCCTTCAGCCGACCCTGCGCTTATCCGGTAACTATCGTCTTGAGTCCAACCCGGTAAGACACGACTT  
 ATCGCCACTGGCAGCAGCCACTGGTAACAGGATTAGCAGAGCGAGGTATGTAGGCGGTGCTACAGAGTTCT  
 TGAAGTGGTGGCCTAACTACGGCTACACTAGAAGGACAGTATTTGGTATCTGCGCTGTGCTGAAGCCAGTTA  
 CCTTCGGAAAAGAGTTGGTAGCTCTTGATCCGGCAAACAACCACCGCTGGTAGCGGTGTTTTTTTGT  
 GCAAGCAGCAGATTACGCGCAGAAAAAAGGATCTCAAGAAGATCCTTTGATCTTTTCTACGGGGTCTGAC  
 GCTCAGTGAACGAAAACCTCACGTTAAGGGATTTTGGTCATGACTAGTGCTTGGATTCTCACCAATAAAAAA

CGCCCGCGGCAACCGAGCGTTCTGAACAAATCCAGATGGAGTTCTGAGGTCATTACTGGATCTATCAACA  
GGAGTCCAAGCGAGCTCTCGAACCCAGAGTCCCGCtcatgagattatcaaaaaggatcttcacctagatccttttaatta  
aaaatgaagtttaaatcaatctaaagtatatatgagtaaacttggctgacagttaccaatgcttaatcagtgaggcacctatctcagcgatc  
tgtctatttcgttcatccatagttgctgactccccgtgctgtagataactacgatacgggagggttaccatctggccccagtgctgcaatgat  
accgagagaccacgctcaccggctccagattatcagcaataaacagccagccggaaggccgagcgcagaagtggctcctgcaacttta  
tccgctccatccagcttattaattgttgcgggaagctagagtaagtagttccgagttatagtttgcgcaacgttgttgcattgctacagg  
catcgtggtgtcacgctcgttggatggcttcattcagctccggttccaacgatcaaggcgagttacatgatccccatggtgtgcaaaa  
aagcggtagctccttccgctcctgatcgttgcagaagtaagttggccgagtggtatcactcatggttatggcagcactgcataattctctt  
actgtcatgcatccgtaagatgcttttctgtgactggtgagtactcaaccaagtcattctgagaatagtgatgcggcgaccgagttgctcttg  
cccgctcaatacgggataataccgcccacatagcagaactttaaagtgtcatcattggaaaacgttcttccggggcgaaaactctcaa  
ggatcttaccgctgttgagatccagttcagtaaccactcgtgcacccaactgatcttcagatcttttactttcaccagcgtttctgggtgag  
caaaaacaggaaggcaaaatgcccaaaaagggaataaggcgacacggaatgttgaatactcatGCGAAACGATCCTCATC  
CTGTCTCTTGATCAGATCTTGATCCCCTGCGCCATCAGATCCTTGGCGGCAAGAAAGCCATCCAGTTTACTTT  
GCAGGGCTTCCCAACCTTACCAGAGGGCGCCCCAGCTGGCAATTCCGACGTCTAAGAAACCATTATTATCAT  
GACATTAACCTATAAAAATAGGCGTATCACGAGGCCCTTTCGTCTTtgcctctagtgaggactggctatgaaccgaacgca  
gtgccggactacatccgatgattttctcattgatccccctgcatatcactgacgggtgatgtaggcgaggaaatcgaagcatatctagtggtgac  
tactgcatgaagatgagctgattttacgccggaatccgctcccagaggagtcaaaccaggagatcatcggaattcctaacaccgc  
aggatactcatgcatatcttgaaagtgcacaccaaataccggttggcgaaaatgtagtggccggaggggcagttagacgatatcg  
atcgggattaagacataaccattcgtaattcttgcagcccccttctgaggtggggatttctttcatccccttaatttttgcgaaatttatac  
agcaatcctgaaatcctaataaagatcccttatcgtgggagaggtagcggtagtctgctgaggacaacgtcgagaaggcatgatttaTa  
aaccgatacaataaagctccttttggagccttttttggagattttcaactgaaaaaattattattcgaattcctttagttgtcctttcta  
ttctcactccgctgaaactgtgaaagttgtagcaaaaccatacagaaaattcatttactaacgtctggaagacgacaaaaactttagat  
cgttacgtaactatgagggtgctgtggaatgctacaggcgtttagttgtagtggtagcgaactcagtttacggtacatgggttccat  
tgggttctgctatccctgaaaatgagggtggtgctctgagggtggcgttctgagggtggcgttctgagggtggcggtactaaacctctg  
agtacgggtgatacacctattccgggctatacttatcaaccctctgacggcacttatccgctggtactgagcaaaaccccgtaatcctaa  
tccttctcttgaggagtctcagcctctaatactttcatgttcagaataatagttccgaaataggcagggggcattaactgtttatacgggca  
ctgttactcaaggcactgacccgttaaaactattaccagtacactcctgtatcatcaaaagccatgatgacgcttactggaacggtaaat  
cagagactgctgttccattctgctttaatgaggatccattcgttgaatatcaaggcaatcgctgacctgctcaacctctgtcaatg  
ctggcggcggtctggtggtggtctggtggcgctctgagggtggtgctctgagggtggcgttctgagggtggcggtctgagggtggc  
ggttccggtggtgctggttccggtgattttgattatgaaaagatggcaaacgctaataaggggctatgaccgaaaatgccgatgaaaa  
cgcgctacagctgacgctaaaggcaaaactgattctgctgactgattacgggtgctgctatcgatggttcatggtgacgttccggcctg  
ctaaggtaatggtgactggtgattttgctggcttaattccaaatggctcaagtcggtgacgggtgataattcacctttaatgaataattcc  
gtcaatattacctccctcccaatcggtgaaatgctgcccccttcttggcgtggtgaaacccatgaattttctattgattgtgacaaaat  
aaacttattccgtggtgcttcttgcgttcttttatgttccacctttatgtatgtattttctacgttggtaacatactgctgtaataaggagtcta  
aTACCCGTTTTTTGGGCTAGAAATAATTTGTTTAACTTTAAGAAGGAGATATACATATGGCTAGCAAAGGA  
GAAGAACTTTTCACTGGAGTTGTCCCAATTCTTGTGAATTAGATGGTGATGTTAATGGGCACAAATTTCTG  
TCAGTGGAGAGGGTGAAGGTGATGCTACATACGAAAGCTTACCCTTAAATTTATTTGCACTACTGAAAAAC  
TACCTGTTCCATGGCCAACACTTGTCACTACTTTCTTATGGTGTCAATGCTTTTCCCGTTATCCGGATCATA  
TGAAACGGCATGACTTTTTCAAGAGTGCCATGCCGAAGGTTATGTACAGGAACGCACTATATCTTTCAAAG  
ATGACGGGAACACAAGACGCGTGCTGAAGTCAAGTTTGAAGGTGATACCTTGTAAATCGTATCGAGTTAA  
AAGGTATTGATTTAAAGAAGATGGAACATTCTCGACACAAACTCGAGTACAATACTACACAATGT  
ATACATCACGGCAGACAAAAGAATGGAATCAAAGCTAACTTCAAATTCGCCACAACATTGAAGATG  
GATCCGTTCACTAGCAGACCATTATCAACAAAATACTCCAATTGGCGATGGCCCTGTCTTTTACCAGACAA  
CCATTACCTGTGCACACAATCTGCCCTTCGAAAGATCCAACGAAAAGCGTGACCACATGGTCCTTCTTGA

GTTTGTAAGCTGCTGGGATTACACATGGCATGGATGAGCTCTACAAATACGAT

## Plasmid map of M13-lysC

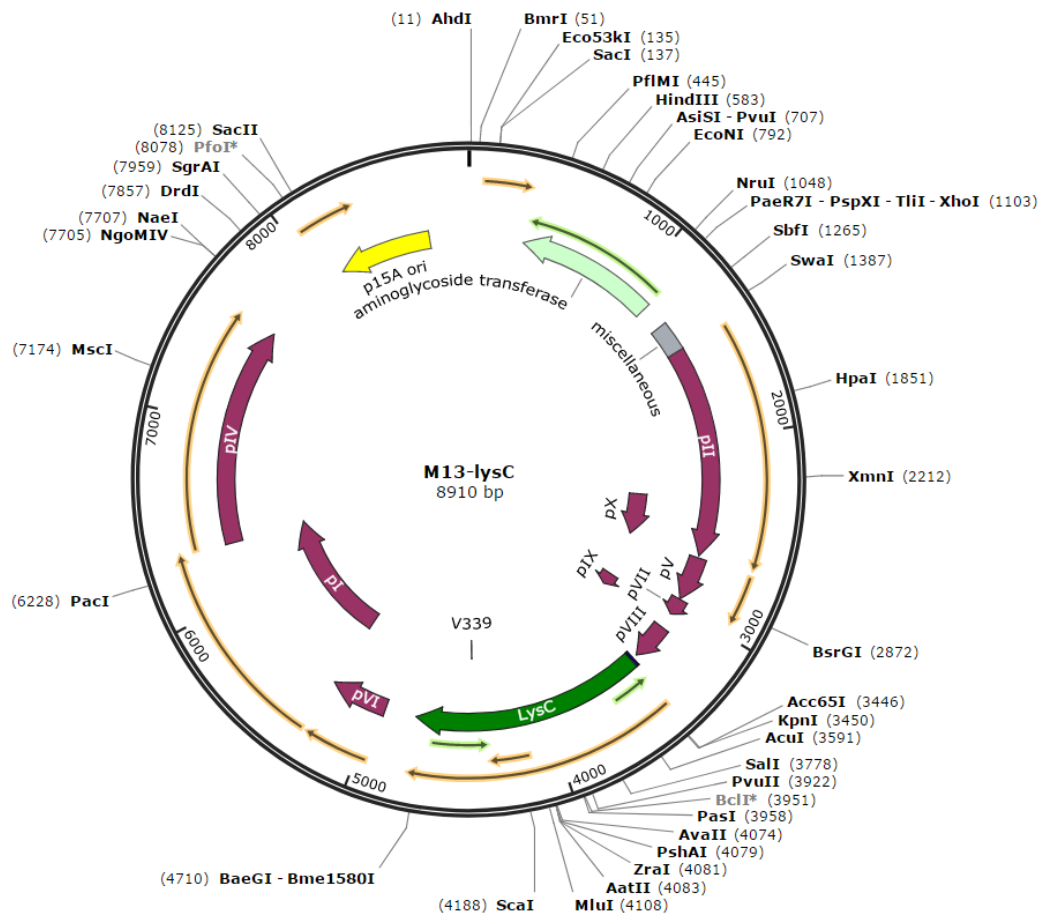

## Full sequences of M13-lysC

tgctgactccccgtgtgtagataactacgatacggggaggcttacatctgccccagtgctgcaatgataccgcgagccacgctcac  
 cggctccagattatcagcaataaacgaccagccgattcgagctcgccggggatcgaccagttggtgattttgaactttgcttgccacgg  
 aacggtctgctgttcggaagatgctgtagctgatcctcaactcagcaaaagttcgattattcaaaaagccgctcccgtcaagttag  
 cgtaatgctctgccagtgtaaccaataaccaattctgattagaaaaactcatcgagcatcaaatgaaactgcaatttattcatatcagga  
 ttatcaataccatattttgaaaaagcgtttctgtaataaggagaaaactcaccgaggcagttccataggatggcaagatcctggtatcgg  
 tctgcgattccgactctcaacatcaatacaacctattaatttcccctgtaaaaataaggttatcaagtgagaaatcaccatgagtgacga  
 ctgaatccggtgagaatggcaaaagcttatgatttcttccagactgttcaacaggccagccattacgctctcatcaaaaactctgcatc  
 aaccaaacggttattcattctgattgctgctgagcgagacgaaatacgcgatcgtgttaaaggacaattacaacagggaatcgaatgca  
 accggcgaggaactgccagcgcacatcaacaatatttcaactgaatcaggatattcttcaataactggaatgctgtttccggggatcgc  
 agtggtagtaaacatgcatcatcaggagtagcagataaaatgcttgatggtcggaaaggacataaattccgtcagccagtttagctgacat  
 ctcatctgtaacatcattggcaacgctaccttggcatgttcagaaactcggcgcacatcgggctccatacaatcagatagattgtcgac  
 ctgattcccgacattatcgcgagccatttatcccatataaatcagcatcattggaatttaacgcgccctcgagcaagacgtttccggt  
 tgaatatggctcataacccccctgtattactgtttatgtaagcagacagttttattgttcatgatgatattttatcttgtgcaatgtaacatca  
 gagattttgaaacacaacgtggctttccccccccctcaggtctcgggctattctttgattataagggttttgcgatttcggcctat  
 tggttaaaaaatgagctgatttaacaaaatttaacgcgaatttaacaaaatattaacgtttacaatttaattttgcttatacaatcttctg  
 ttttggggctttcttattatcaaccggggtacatatgattgacatgtagttttacgattaccgttcatcagattcttgtttgctccagactctca  
 ggcaatgacctgatagccttttagacctctcaaaaatagctaccctctcggcatgaattatcagctagaacggttgaatatcatgttgatg  
 gtgattgactgtctccggcctttctaccctttgaaatcttacctacattactcaggcattgcattaaaatatagagggttctaaaaat

tatccttgcttgaaataaaggcttctcccgaagatttacagggtcataatgttttggtaaccgatttagctttagctctgaggcttta  
ttgcttaattttgctaattctttgccttgctgtatgatttattggatgtaaacgctactactattagtagaattgatgccacctttcagctcgcgc  
ccaaatgaaatatagctaacagggtattgaccatttgcgaaatgatctaattggtaaaactaatctactcgttcgcagaattgggaatca  
actgttcatggaatgaaactccagacaccgtaactttagtgcatatttaaacatgttgagctacagcaccagattcagcaattaagctcta  
agccatcgcgaaaaatgacctctatcaaaaggagcaattaaggtactctctaactcctgacctgttgagttgcttccggctggttcgctt  
gaagctcgaatgaaacgcgatatttgaagctttcgggcttctcttaactttttgatgcaatccgcttctctgactataatagtcagggt  
aaagacctgattttgattatggctattctgttttctgaactgttaagcattgaggggattcaatgaatattatgacgattccgcagtat  
tggacgctatccagctaaacattttactattaccccctggcaaaactctttgcaaaagcctctcgctattttggttttatcgtcgtctgga  
aacgagggttatgatagttgctcttactatgcctcgaattccttttggcgttatgatctgcattagttgaatgtggtattcctaaatcctaac  
tgatgaatctttctactgtaataatgttctcgttagtctgttttattaacgtagatttttctccaacgtcctgactggtataatgagccagttc  
ttaaactcgcataaggaattcaaatgattaaagttgaaattaaaccatctcaagcccaatttactactcgttctggtgtttctcgtcagggca  
agccttattcactgaatgagcagctttgttacgttgatttgggtaatgaatatccggttctgtcaagattactcttgatgaaggtcagccagcct  
atgctcgtggtctgtacaccgttcatctgtcctcttcaaaagttggctcagttcggttcccttatgattgacctctgcgcctcgttccggctaagta  
acatggagcaggtcgcggatttcgacacaatttaccgagcagatatacaaatctcgttctgacttttctcgcgttggtaataatcgtcgggggt  
caaagatgagtgtttagtgattctttcgcctcttctgttttaggttggctcgtctgtagggcattacgtattttaccgtttaaagaaacttct  
catgaaaaagtcttagtctcaaacgctctgtagccgttctaccctcgttccgatgctgtcttctcgtcgtgagggtgacgatcccgcaaaag  
cggcctttaaactcctcgaagcctcagcagcgaatatacggttatcgtgggcgatggttgtgtcattgtcggcgaactatcggtatcaa  
gctgtttaaagaattcaacctgaaagcaagctgataaacgatacaattatactagagaaagaggagaaatactagatgTCTGAAATTG  
TTGTCTCCAAATTTGGCGGTACCAGCGTAGCTGATTTTGACGCCATGAACCGCAGCGCTGATATTGTGCTTTC  
TGATGCCAACGTGCGTTTAGTTGTCCTCTCGGCTTCTGCTGGTATCACTAATCTGCTGGTTCGCTTTAGCTGAA  
GGACTGGAACCTGGCGAGCGATTTCGAAAACTCGACGCTATCCGCAACATCCAGTTTGCCATTCTGGAACG  
TCTGCGTTACCCGAACGTTATCCGTGAAGAGATTGAACGTCTGCTGGAGAACATTACTGTTCTGGCAGAAGC  
GGCGGCGCTGGCAACGTCTCCGGCGCTGACAGATGAGCTGGTCAGCCACGGCGAGCTGATGTGACCCCTG  
CTGTTTGTGAGATCTGCGGAACGCGATGTTACAGGCACAGTGGTTTGTATGTACGTAAAGTGATGCGTACC  
AACGACCGATTGGTCTGTCAGAGCCAGATATAGCCGCGCTGGCGGAACTGGCCGCGCTGCAGCTGCTCCC  
ACGTCTCAATGAAGGCTTAGTGATCACCCAGGGATTTATCGGTAGCGAAAATAAAGGTGCTACAACGACGCT  
TGGCCGTGGAGGCAGCGATTATACGGCAGCCTTGCTGGCGGAGGCTTACACGCATCTCGTGTGATATCTG  
GACCGACGTCCCGGCATCTACACCACCGATCCACGCGTAGTTTCCGCAGCAAACGCATTGATGAAATCGC  
GTTTGCCGAAGCGGCAGAGATGGCAACTTTTGGTGCAAAGTACTGCATCCGGCAACGTTGCTACCCGAG  
TACGCAGCGATATCCGGTCTTTGTGCGGCTCCAGCAAAGACCCACGCGCAGGTGGTACGCTGGTGTGCAAT  
AAAAGTAAAATCCGCCGCTGTTCCGCGCTCTGGCGCTTCTGCGCAATCAGACTCTGCTCACTTTGCACAGC  
CTGAATATGCTGCATTCTCGCGTTTCTCGCGGAAGTTTTCGGCATCCTCGCGCGCATAATATTTCCGGTAG  
ACTTAATCACCGTCAGAAGTGAGCGTGGCATTAAACCCTTGATACCACCGTTCAACCTCCACTGGCGATA  
CGTTGCTGACGCAATCTGCTGATGGAGCTTCCGCACTGTGTCGGGTGGAGGTGGAAGAAGGTCTGGC  
GCTGGTCCGCTTGATTGGCAATGACCTGTCAAAGCCTGCGGCGTTGGCAAAGAGGTATTCCGGCTACTGG  
AACCGTTCAACATTGCGATGATTTGTTATGGCGCATCCAGCCATAACCTGTGCTTCTGGTGGCCGCGAAGA  
TGCCGAGCAGGTGGTGCAAAAAGTGCATAGTAATTTGTTTGTAGtaactccctcaatcggttgaatgctccctttgtcttt  
ggcgtggttaaaccatgaattttctattgattgtgacaaaataaactattcctggtgtctttgctttctttatattggtccaccttatgta  
tgtattttctactgtttgtaacatactcgttaataaggagtctaatcatgccagttctttgggtattcgttattattgctttcctcgtttccttc  
tgtaactttgttcggtatctgcttacttttcttaaaagggtcctcgtaagatagctattgctattcattgtttctgtcttattattgggctta  
actcaattctgtgggttatctctctgatattagcctcaattaccctctgactttgttcagggtgttcagtttaattcctccgtcaatgcgctccc  
tgtttttatgtattctctctgtaaaggctgctattttcattttgacgttaacaaaaaatcgtttctatttgattgggataaataatggctgt  
ttattttgtaactggcaattaggctcggaaagacgctcgttagcgttgtaagattcaggataaaattgtagctgggtgcaaaatagcaac  
taatcttgatttaaggctcaaaaacctcccgaagtcgggaggttcgctaaaacgctcgcgttcttagaataaccggataagccttctatatct

gatttgcttgctattgggcgcggaatgattcctacgatgaaaataaaaaaggcttgctgttctcgatgagtgcggtacttggttaatacccg  
ttcttggaatgataaggaagacagccgattattgattggttctacatgctcgttaaattaggatgggatattatcttctgttcaggacttatct  
attgttgataaacaggcgcgttctgattagctgaacatgttgtttattgtcgtcgtctggacagaattactttacctttgtcggactttatattc  
tcttattactggctcgaaaatgcctctgcctaaattacatgttggcgttgtaaataatggcgattctcaattaagccctactgttgagcgttggct  
ttatactggaagaattgtataacgcatatgatactaaacaggccttttctagtaattatgattccggtgttattcttattaacgccttattat  
cacacggctggtattcaaacctaaattaggtcagaagatgaaatctaaatataatggaaaaagtttctcgcgttcttctgtcttgcg  
attggattgcatcagcattacatagttatataacccaacctaagccggagggttaaaaggtagtctctcagacctatgattttgataaatt  
cactattgactcttctcagcgtctaatctaagctatcgtatgtttcaaggattctaagggaataaataatagcgacgattacagaagc  
aaggttattcactacatattgatttattgactgtttcattaaaaaaggtaattcaaatgaaattgttaaatgataaattttgtttctgat  
gtttgtttcatcatcttcttctgctcaggaattgaaatgaataatcgcctctcgcgattttgtaacttggtattcaagcaatcaggcgaatcc  
gttattgtttctccgatgtaaaggactgttactgtatattcatctgacgttaaactgaaaatctacgcaatttcttatttctgtttacgtgc  
aaataattttgataggttagttctaaccttccattattcagaagtataatccaaacaatcaggattatattgatgaattgccatcatctgata  
atcaggaatgatgataatccgctccttctggtggttcttctgtccgcaaatgataatgttactcaaacctttaaataaactgctcggg  
caaggatttaatacaggtgtcgaattgtttgtaaagtctaacttcaaatcctcaaatgtattatctattgacggctctaactattagttgt  
tagtgcctaaagatatttagataacctcctcaattccttcaactgttattgccaactgaccagatattgattgagggttgatattgag  
gttcagaaggatgactttatagttttcattgtctgctggctcagcgtggcactgttgaggcgggttaatactgaccgcctcacctctgttt  
tatcttctgctggtggtcgttctggtatttttaaggcgatgttttagggctatcagttcgcgcattaaagactaatagccattcaaaaatattgtc  
tgtgccacgtattctacgcttcaggtcagaagggttctatctctgttggccagaatgtcccttttattactggctggtgactggtgaatctgcc  
aatgtaataatccattcagacgattgagcgtcaaaatgtaggtatttccatgagcgttttctgttgcaatggctggcggaatattgttctg  
gatattaccagcaagccgatagtttgagttcttactcaggcaagtgttattactaatcaagaagtattgtcacaacggtaattttgcg  
tgatggacagactctttactcgttggcctcactgattataaaaaacttctcaggttctgctgaccgttctgtctaaaaatcccttaactcg  
cctcctgttagctcccgtctgattctaacgaggaaagcacgttatacgtcgtcgtcaaagcaaccatagtagcgcctctgtagcggcgatt  
aagcggcggggtggtggttacgctcagcgtgaccgctacacttgcagcgccttagcgcctccttctccttcttctccttctcctcctc  
ccacgttcgcccgtttcccgtcaagctctaaatcgggggtcctccttaggggtccgatttagtctttacggcacctcgaccccaaaaaact  
gattgggtgatggttacgtagtggccatcgcctgatagacggttttgcctttgacgttggagtccacgttcttaatagtgactcttg  
ttcaaacctggaacaactcaaccctatctcgggacggatcgttcatgtggcaggagaaaaaggctgcaccggctcgtcagcagaata  
tgtgatacaggatattccgcttctcgtcactgactcgtcactcgtcgttctgactcggcgagcggaaatggcttacgaacggggcg  
gagatttctggaagatgccaggaagataacttaacagggaagtgaagggcgcggcaagccgttttccataggtcggccccctgac  
aagcatcacgaaatctgacgctcaaatcagtggtggcgaacccgacaggactataaagatacaggcgtttcccctggcggtcctcctg  
gcgctcctgcttctgccttctcgtttaccggtgtcattccgctgttatggccggtttgtctcattccacgctgacactcagttccgggtaggc  
agttcgtccaagctggactgtatcacgaacccccgtttagtccgaccgtcgccttatccgtaactatcgtcttgagttcaaccggaa  
agacatgcaaaagcaccactggcagcagccactgtaattgatttagaggatgtagtctgaagtcagcgcggtaaggctaaactgaaa  
ggacaagtttgggtgactcgcctccaagccagttacctggttcaagagttgtagctcagagaacctcgaaaaaccgctgcaag  
gagggttttctgtttcagagcaagagattacgcgcagacccaaacgatctcaagaagatcatcttattaaggggtctgacgctcagtggaac  
gaaaactcacgtaagggttttggcatgagattatcaaaaaggatctcacctagatcctttaaataaaaaatgaagtttaaatcaatct  
aaagtatatatgagtaaactggctgacagttaccaatgcttaacagtgaggcacctatctcagcgatctgtctatttcttcatcatag
